# Supplementary material for: Functional material-mediated wireless physical stimulation for neuro-modulation and regeneration
Source: Royal Society of Chemistry journal article supplement (doi:10.1039/d3tb01354e), 2023-01-01
Supplement: d3tb01354e1.pdf [file d3tb01354e1.pdf]

## Electronic Supplementary Information

### Functional material-mediated wireless physical stimulation for neuro-modulation and regeneration

Jialu Li,<sup>‡a</sup> Chengheng Wu,<sup>‡a,b</sup> Mingze Zeng,<sup>a</sup> Yusheng Zhang,<sup>a</sup> Dan Wei,<sup>a</sup> Jing Sun,<sup>a</sup> Hongsong Fan<sup>\*a</sup>

<sup>a</sup> National Engineering Research Center for Biomaterials, College of Biomedical Engineering, Sichuan University, Chengdu 610064, Sichuan, China

E-mail: hsfan@scu.edu.cn

<sup>b</sup> Institute of Regulatory Science for Medical Devices, Sichuan University, Chengdu 610065, Sichuan, China

<sup>‡</sup> These authors contributed equally to this work.

**Table S1** Overview of the functional materials for wireless physical stimulation.

| Stimulation type          | Biomaterial   | Feature                                                                                         | Stimulation parameter                                                                                                                                                                                     | Cell/animal response                                                                                                        | Ref. |
|---------------------------|---------------|-------------------------------------------------------------------------------------------------|-----------------------------------------------------------------------------------------------------------------------------------------------------------------------------------------------------------|-----------------------------------------------------------------------------------------------------------------------------|------|
| Piezoelectric stimulation | PVDF          | A nanopillar array fabricated by hot-pressing                                                   | US, 5 min, 2 times a day, 300-500 W                                                                                                                                                                       | Neuron-like differentiation of rBMSCs                                                                                       | 1    |
|                           | BZT-BCT/PVDF  | Thin films fabricated by electrospinning of the composite containing PVDF and BZT-BCT nanowires | US, 1 MHz, pulse width 5 ms, pulse interval 100 ms, acoustic pressure 150 kPa                                                                                                                             | The generation of CMAPs and the twitching of limbs                                                                          | 2    |
|                           | KNN/PLA       | A biodegradable 3D multichannel nanofiber scaffold                                              | US:<br>(1) <i>In vitro</i> : 20 min, 1 MHz, 0-150 kPa;<br>(2) <i>In vivo</i> : 20 min every 2 days, lasted for 4 weeks                                                                                    | (1) Neuronal differentiation of NSCs;<br>(2) Neuro-regeneration and functional recovery of SCI rats                         | 3    |
|                           | BN            | BN nanotubes prepared by annealing can be internalized by cells                                 | US, 20 W, 40 kHz, for 5 s, 4 times a day for 9 days                                                                                                                                                       | Promoted neurite outgrowth of PC 12 cells                                                                                   | 4    |
|                           | BTNPs         | Tetragonal BTNPs                                                                                | US, 1 MHz, 0.1-0.8 W/cm <sup>2</sup>                                                                                                                                                                      | US induced calcium transient in SH-SY5Y cells                                                                               | 5    |
|                           | BTNP-PDA-BNN6 | US-driven release of NO, allowing the BBB penetration                                           | US:<br>(1) <i>In vitro</i> : 2.2 MHz, 10 s, 0.4 W/cm <sup>2</sup> ,<br>(2) <i>In vivo</i> : 1.5 MHz, 462.4 W/cm <sup>2</sup> , duty cycle: 10%, pulse repetition frequency: 10 Hz, 66.4 W/cm <sup>2</sup> | (1) Increased Ca <sup>2+</sup> influx and dopamine release of SH-SY5Y cells;<br>(2) Alleviated symptoms of the mice with PD | 6    |

|                            |                                                      |                                                                                                                             |                                                                                                                                                                                                |                                                                                                                                                                                                          |    |
|----------------------------|------------------------------------------------------|-----------------------------------------------------------------------------------------------------------------------------|------------------------------------------------------------------------------------------------------------------------------------------------------------------------------------------------|----------------------------------------------------------------------------------------------------------------------------------------------------------------------------------------------------------|----|
| ME stimulation             | CoFe <sub>2</sub> O <sub>4</sub> @BaTiO <sub>3</sub> | Core-shell MENPs can be stereotactically injected into deep brain                                                           | (1) <i>In vitro</i> : 225 mT (DC MF), 6 mT, 140 Hz (AC MF);<br>(2) <i>In vivo</i> : 220 mT (DC MF), 6 mT, 140 Hz (AC MF), 180 s                                                                | (1) Induced Ca <sup>2+</sup> transient f SH-SY5Y;<br>(2) Increased expression of c-Fos <i>in vivo</i> and controlled mouse behavior                                                                      | 7  |
|                            | FO@BTO/AHA hydrogel                                  | Core-shell MENPs were combined with biomimetic hydrogel with features of native neural ECM                                  | Pulsed MF (13 mT, 60 Hz, duty cycle of 50%), 0.5 h per day                                                                                                                                     | (1) Promoted neurogenesis of PC 12 cells <i>in vitro</i> ;<br>(2) facilitated neuro-regeneration in SCI rats                                                                                             | 8  |
|                            | GO/CFO/PVDF                                          | ME nanofiber films prepared by electrospinning                                                                              | EMFs, 1 mT, 50 Hz, 8 h/day for 21 days                                                                                                                                                         | Neuron-like differentiation of MSCs                                                                                                                                                                      | 9  |
|                            | Metglas/PVDF or PZT                                  | The nanogenerators were implanted into the STN of rats with PD, ensuring ME stimulation in freely moving rats               | AMF, 1.5 mT, 1 min, 200 Hz, biphasic pulses                                                                                                                                                    | Decreased rotation rate of the rats with PD                                                                                                                                                              | 10 |
|                            | Metaglas/PZT                                         | The ME film can be implanted directly and delivered through a percutaneous catheter to big animals                          | AMF, <1 mT, 3 V, 1.5 ms pulse width monophasic, 1-10 Hz                                                                                                                                        | Induced CMAPs of rats and pigs                                                                                                                                                                           | 11 |
| Optoelectrical stimulation | Silicon                                              | Nanoporous/non-porous silicon heterojunctions fabricated by metal-free etching                                              | 532 nm laser: 10 ms, 8-68 mW/mm <sup>2</sup> ;<br>808 nm laser: 10 ms, 15-209 mW/mm <sup>2</sup>                                                                                               | <i>In vivo</i> sciatic nerve simulation induced the generation of APs and leg displacement of rats                                                                                                       | 12 |
|                            | Silicon                                              | Silicon structures, including nanowires, membranes and meshes for multiscale stimulation <i>in vitro</i> and <i>in vivo</i> | (1) For cells: 592 nm, 14.4 mW, 237 nm spot size, 1 ms;<br>(2) For brain slice: 473 nm, 1 ms, 2 mW, 57 μm spot size;<br>(3) <i>In vivo</i> photo-stimulation: 473 nm, 4-5 mW, 216 μm spot size | (1) Induced intracellular Ca <sup>2+</sup> influx in both DRG and glial cells;<br>(2) Generation of excitatory postsynaptic currents in brain slices;<br>(3) Evoked small ipsilateral forelimb movements | 13 |

|                            |                                                |                                                                                                                                 |                                                                                                                                   |                                                                                                                      |    |
|----------------------------|------------------------------------------------|---------------------------------------------------------------------------------------------------------------------------------|-----------------------------------------------------------------------------------------------------------------------------------|----------------------------------------------------------------------------------------------------------------------|----|
|                            | P3HT                                           | Photovoltaic layer prepared by spin-coating                                                                                     | (1) <i>In vitro</i> : 532 nm, 20 ms, 15 mW/mm <sup>2</sup> , 1-20 Hz;<br>(2) <i>In vivo</i> : 532 nm, 10 ms, 4 mW/mm <sup>2</sup> | (1) Induced the generation of APs in primary neurons;<br>(2) Restored light-responses in blind retinas               | 14 |
|                            | P3HT/collagen or collagen/hyaluronan hydrogels | Hydrophilic P3HT NPs were integrated into biomimetic hydrogels to create a neural interface and a 3D biomimetic stem cell niche | 530 nm pulsed light, 6 mW/cm <sup>2</sup> , 500 ms duration, 1 Hz, 30 min/12 h                                                    | (1) Promoted growth of primary neurons;<br>(2) Enhanced neuronal differentiation of BMSCs                            | 15 |
| Magnetothermal stimulation | MnFe <sub>2</sub> O <sub>4</sub>               | The MnFe <sub>2</sub> O <sub>4</sub> NPs (d=6 nm) were conjugated with streptavidin for specific targeting                      | RF magnetic field (40 MHz, 8.4 G, 30 s)                                                                                           | TRPV1 opening and activation of APs in HEK 293 cells;                                                                | 16 |
|                            | Fe <sub>3</sub> O <sub>4</sub>                 | MNPs were modified with PEG shell                                                                                               | AMF, $f=500$ kHz, $H_0=15$ kA/m                                                                                                   | (1) Evoked correlated trains of APs in neurons <i>in vitro</i> ;<br>(2) Increased expression of <i>c-Fos in vivo</i> | 17 |
|                            | Co-Mn-Ferrite                                  | Core-shell MNPs                                                                                                                 | AMF:<br>(1) <i>In vitro</i> : 412.5 kHz, 22.4 kA/m, 5 s;<br>(2) <i>In vivo</i> : 570 kHz, 7.5 kA/m, 1 min                         | (1) Elicited AP firing in neurons;<br>(2) Increased angular velocity of movement in a mouse model                    | 18 |
| Photothermal stimulation   | Gold                                           | Gold nanostars prepared by a modified seedless and surfactant free method                                                       | 785 nm laser, 3-15 mW/mm <sup>2</sup> , 10 s,                                                                                     | Inhibition of neuronal activity                                                                                      | 19 |
|                            | Graphene                                       | A nanowire-templated 3D fuzzy graphene                                                                                          | 405 nm laser, 1.2 ms pulse duration, 1.45-3.02 mW, 1-20 Hz                                                                        | Highly controlled activation of APs in DRG neurons                                                                   | 20 |
|                            | PDA/collagen                                   | PDA NPs were integrated with collagen to prepare a photothermal 3D foam                                                         | 808 nm laser, 6 mW/mm <sup>2</sup> , 10-30 s duration                                                                             | Suppressed spike rate of neurons                                                                                     | 21 |

|                           |                                                                                     |                                                                                                                                          |                                                                                                                                      |                                                                                                                                                             |    |
|---------------------------|-------------------------------------------------------------------------------------|------------------------------------------------------------------------------------------------------------------------------------------|--------------------------------------------------------------------------------------------------------------------------------------|-------------------------------------------------------------------------------------------------------------------------------------------------------------|----|
|                           | Gold                                                                                | Gold nanorods                                                                                                                            | 980 nm laser, 1 ms duration, 0.159-1.046 J/cm <sup>2</sup> ,                                                                         | Elicited compound nerve APs of rat sciatic nerves                                                                                                           | 22 |
| Photoacoustic stimulation | ZnO/epoxy @ graphite/epoxy                                                          | A fiber-optoacoustic convertor with tip composed of ZnO/epoxy @ graphite/epoxy double-layer structure used for photoacoustic stimulation | 1030 nm laser, 3 ns pulse width, 100 μJ, 3.6 kHz, 200 ms                                                                             | (1) Induced Ca <sup>2+</sup> transient in primary neurons;<br>(2) Induced neural activation in mouse brain                                                  | 23 |
|                           | CNT/PDMS                                                                            | CNT/PDMS act as the light absorption/thermal expansion layer                                                                             | 1030 nm laser, 3 ns pulse width, 11.4 mW, 1.7 kHz, 1 and 50 ms duration                                                              | Activation of a single neuron or subcellular structures                                                                                                     | 24 |
|                           | Polystyrene-block-poly (acryl acid)                                                 | The photoacoustic nanotransducers can be conjugated with targeting antibodies                                                            | 1030 nm laser, 3 ns pulse width, 3.3 kHz, 3 ms, 2.1 mJ/cm <sup>2</sup> ( <i>in vitro</i> ), 21 mJ/cm <sup>2</sup> ( <i>in vivo</i> ) | (1) Transient activation of neurons;<br>(2) Induced local field potential in brain of mice                                                                  | 25 |
|                           | PANIP-ES@AOT                                                                        | The nanovesicles were prepared by HRP/H <sub>2</sub> O <sub>2</sub> -triggered polymerization on AOT vesicles                            | (1) <i>In vitro</i> : 1064 nm, 40 μJ, 10 ms pulse width,<br>(2) <i>In vivo</i> : 1064 nm, 40 μJ, 10 s pulse width, 20 Hz, 10 s       | (1) Ca <sup>2+</sup> transient in DRG neurons;<br>(2) Increased neuronal firing rates in mouse hippocampus and motor cortex and induced fast motion of mice | 26 |
|                           | CNT/silk                                                                            | Photoacoustic scaffold was prepared by embedding PEG-functionalized CNTs into silk                                                       | 1030 nm laser, 3 ns pulse width, 1.7 kHz, 8.8-23.5 μJ, 5 ms duration, every 2 min within total duration of 1 h                       | Induced Ca <sup>2+</sup> transient, promoted neurite outgrowth of DRG neurons and increased expression of BDNF and NGF                                      | 27 |
| Optogenetic stimulation   | NaYF <sub>4</sub> :Yb <sup>3+</sup> /Tm <sup>3+</sup> @NaYF <sub>4</sub> (UCNP)/PCL | The UCNP were combined with collagen-modified PCL scaffold by electrospinning and electrospaying                                         | 980 nm laser, 800 mW/cm <sup>2</sup> , 500 ms pulse width, 1 Hz, 10 min/12 h;                                                        | Promoted neurite extension of PC 12 cells expressing CatCh                                                                                                  | 28 |

|                               |                                                                                                       |                                                                                                                                                                                                                      |                                                                                                                                                                                                                                      |                                                                                                                                                                                                              |    |
|-------------------------------|-------------------------------------------------------------------------------------------------------|----------------------------------------------------------------------------------------------------------------------------------------------------------------------------------------------------------------------|--------------------------------------------------------------------------------------------------------------------------------------------------------------------------------------------------------------------------------------|--------------------------------------------------------------------------------------------------------------------------------------------------------------------------------------------------------------|----|
|                               | NaYF <sub>4</sub> :Yb/Tm@SiO <sub>2</sub>                                                             | Silica was used to decorate UCNP to optimize the biocompatibility and long-term utility                                                                                                                              | 980 nm laser:<br>(1) <i>In vitro</i> : 0.35-8.22 W/mm <sup>2</sup> , 10-50 Hz;<br>(2) <i>In vivo</i> : 15-ms pulses at 20 Hz, 700 mW peak power<br>(3) <i>In vivo</i> : 15-ms pulses at 8 Hz, 3.0 W peak power, 360 mW average power | (1) Evoked spikes in neurons expression ChR2 <i>in vitro</i> ;<br>(2) Increased expression of c-Fos and release of dopamine <i>in vivo</i> ;<br>(3) Induced hippocampal local field potential <i>in vivo</i> | 29 |
|                               | NaYF <sub>4</sub> :Yb/Er@ NaYF <sub>4</sub> (UCNP)/polypropylene (PP)                                 | The UCNP was combine with PP and implanted at the spinal cord of mice                                                                                                                                                | 980 nm laser, 20 mW/mm <sup>2</sup> , 0.5 and 1 Hz, 50 ms pulse width,                                                                                                                                                               | Induced muscular activity in ChR2-transfected mice and inhibited movement                                                                                                                                    | 30 |
|                               | Zinc doped iron oxide (Zn <sub>0.4</sub> Fe <sub>2.6</sub> O <sub>4</sub> )                           | Octahedral Zn <sub>0.4</sub> Fe <sub>2.6</sub> O <sub>4</sub> NPs assemble into m-Torquer that is used to generate torque force when exposed to a rotating magnetic field generated by a circular magnet array (CMA) | Rotating CMA: 0.5 s pulse duration, 0.5 Hz, 90 degree turn                                                                                                                                                                           | (1) Induced Ca <sup>2+</sup> influx in neurons;<br>(2) <i>In vivo</i> stimulation activated mouse motility                                                                                                   | 31 |
| Magnetomechanical stimulation | Fe <sub>3</sub> O <sub>4</sub>                                                                        | Magnetite nanodiscs were produced by reducing hematite to magnetite                                                                                                                                                  | Magnetic field, 1-5 Hz, 7-28 mT, 4 pulses of 10 s at intervals of 30s.                                                                                                                                                               | Increased Ca <sup>2+</sup> influx in HEK-293 cells expressing TRPV4                                                                                                                                          | 32 |
|                               | Mercaptan-functionalized magnetic particles/HA hydrogel                                               | 3D magnetic hydrogel composed of hyaluronan with similar biochemical and biophysical properties to brain tissue                                                                                                      | Magnetomechanical stimulation (calculated): 0.136 Hz, 0.15 to 1 μN, 30 min/day, 4 days                                                                                                                                               | Increased Ca <sup>2+</sup> influx in DRG neurons                                                                                                                                                             | 33 |
|                               | Zn <sub>0.4</sub> Fe <sub>2.6</sub> O <sub>4</sub> @SiO <sub>2</sub> @pNiP MAm hydrogel nanoparticles | Zn <sub>0.4</sub> Fe <sub>2.6</sub> O <sub>4</sub> converts magnetic anisotropic energy to thermal energy to induce the pNiPMAM contraction                                                                          | AMF, 500 kHz at 500 Oe, 30 s ON/2 min OFF cycle for 15 times                                                                                                                                                                         | Activation of the Notch signaling in Notch1-U2OS cells                                                                                                                                                       | 34 |

## References

1. L. Liang, C. Sun, R. Zhang, S. Han, J. Wang, N. Ren and H. Liu, *Nano Energy*, 2021, **90**, 106634.
2. P. Chen, P. Wu, X. Wan, Q. Wang, C. Xu, M. Yang, J. Feng, B. Hu and Z. Luo, *Nano Energy*, 2021, **86**, 106123.
3. P. Chen, C. Xu, P. Wu, K. Liu, F. Chen, Y. Chen, H. Dai and Z. Luo, *ACS Nano*, 2022, **16**, 16513-16528.
4. G. Ciofani, S. Danti, D. D'Alessandro, L. Ricotti, S. Moscato, G. Bertoni, A. Falqui, S. Berrettini, M. Petrini, V. Mattoli and A. Menciassi, *ACS Nano*, 2010, **4**, 6267-6277.
5. A. Marino, S. Arai, Y. Hou, E. Sinibaldi, M. Pellegrino, Y.-T. Chang, B. Mazzolai, V. Mattoli, M. Suzuki and G. Ciofani, *ACS Nano*, 2015, **9**, 7678-7689.
6. T. Kim, H. J. Kim, W. Choi, Y. M. Lee, J. H. Pyo, J. Lee, J. Kim, J. Kim, J.-H. Kim, C. Kim and W. J. Kim, *Nat. Biomed. Eng.*, 2023, **7**, 149-163.
7. K. L. Kozielski, A. Jahanshahi, H. B. Gilbert, Y. Yu, Ö. Erin, D. Francisco, F. Alosaimi, Y. Temel and M. Sitti, *Sci. Adv.*, **7**, eabc4189.
8. Y. Zhang, S. Chen, Z. Xiao, X. Liu, C. Wu, K. Wu, A. Liu, D. Wei, J. Sun, L. Zhou and H. Fan, *Adv. Healthcare Mater.*, 2021, **10**, 2100695.
9. E. Esmaeili, M. Soleimani, M. A. Ghiass, S. Hatamie, S. Vakilian, M. S. Zomorrod, N. Sadeghzadeh, M. Vossoughi and S. Hosseinzadeh, *J. Cell. Physiol.*, 2019, **234**, 13617-13628.
10. A. Singer, S. Dutta, E. Lewis, Z. Chen, J. C. Chen, N. Verma, B. Avants, A. K. Feldman, J. O'Malley, M. Beierlein, C. Kemere and J. T. Robinson, *Neuron*, 2020, **107**, 631-643.e635.
11. J. C. Chen, P. Kan, Z. Yu, F. Alrashdan, R. Garcia, A. Singer, C. S. E. Lai, B. Avants, S. Crosby, Z. Li, B. Wang, M. M. Felicella, A. Robledo, A. V. Peterchev, S. M. Goetz, J. D. Hartgerink, S. A. Sheth, K. Yang and J. T. Robinson, *Nat. Biomed. Eng.*, 2022, **6**, 706-716.
12. A. Prominski, J. Shi, P. Li, J. Yue, Y. Lin, J. Park, B. Tian and M. Y. Rotenberg, *Nat. Mater.*, 2022, **21**, 647-655.
13. Y. Jiang, X. Li, B. Liu, J. Yi, Y. Fang, F. Shi, X. Gao, E. Sudzilovsky, R. Parameswaran, K. Koehler, V. Nair, J. Yue, K. Guo, Y. Fang, H.-M. Tsai, G. Freyermuth, R. C. S. Wong, C.-M. Kao, C.-T. Chen, A. W. Nicholls, X. Wu, G. M. G. Shepherd and B. Tian, *Nat. Biomed. Eng.*, 2018, **2**, 508-521.
14. D. Ghezzi, M. R. Antognazza, R. Maccarone, S. Bellani, E. Lanzarini, N. Martino, M. Mete, G. Pertile, S. Bisti, G. Lanzani and F. Benfenati, *Nat. Photonics*, 2013, **7**, 400-406.

15. C. Wu, Y. Pu, Y. Zhang, X. Liu, Z. Qiao, N. Xin, T. Zhou, S. Chen, M. Zeng, J. Tang, J. Pi, D. Wei, J. Sun, F. Luo and H. Fan, *Adv. Healthcare Mater.*, 2022, **11**, 2201255.
16. H. Huang, S. Delikanli, H. Zeng, D. M. Ferkey and A. Pralle, *Nat. Nanotechnol.*, 2010, **5**, 602-606.
17. R. Chen, G. Romero, M. G. Christiansen, A. Mohr and P. Anikeeva, *Science*, 2015, **347**, 1477-1480.
18. R. Munshi, S. M. Qadri, Q. Zhang, I. Castellanos Rubio, P. del Pino and A. Pralle, *eLife*, 2017, **6**, e27069.
19. J. W. Lee, H. Jung, H. H. Cho, J. H. Lee and Y. Nam, *Biomaterials*, 2018, **153**, 59-69.
20. S. K. Rastogi, R. Garg, M. G. Scopelliti, B. I. Pinto, J. E. Hartung, S. Kim, C. G. E. Murphey, N. Johnson, D. San Roman, F. Bezanilla, J. F. Cahoon, M. S. Gold, M. Chamanzar and T. Cohen-Karni, *Proc. Natl. Acad. Sci.*, 2020, **117**, 13339-13349.
21. H. Gholami Derami, P. Gupta, K.-C. Weng, A. Seth, R. Gupta, J. R. Silva, B. Raman and S. Singamaneni, *Adv. Mater.*, 2021, **33**, 2008809.
22. K. Eom, J. Kim, J. M. Choi, T. Kang, J. W. Chang, K. M. Byun, S. B. Jun and S. J. Kim, *Small*, 2014, **10**, 3853-3857.
23. Y. Jiang, H. J. Lee, L. Lan, H.-a. Tseng, C. Yang, H.-Y. Man, X. Han and J.-X. Cheng, *Nat. Commun.*, 2020, **11**, 881.
24. L. Shi, Y. Jiang, F. R. Fernandez, G. Chen, L. Lan, H.-Y. Man, J. A. White, J.-X. Cheng and C. Yang, *Light Sci. Appl.*, 2021, **10**, 143.
25. Y. Jiang, Y. Huang, X. Luo, J. Wu, H. Zong, L. Shi, R. Cheng, Y. Zhu, S. Jiang, L. Lan, X. Jia, J. Mei, H.-Y. Man, J.-X. Cheng and C. Yang, *Matter*, 2021, **4**, 654-674.
26. Y. Zhang, D. Yang, J. Nie, J. Dai, H. Wu, J. C. Zheng, F. Zhang and Y. Fang, *Adv. Mater.*, 2023, **35**, 2208601.
27. N. Zheng, V. Fitzpatrick, R. Cheng, L. Shi, D. L. Kaplan and C. Yang, *ACS Nano*, 2022, **16**, 2292-2305.
28. C. Wu, B. Su, N. Xin, J. Tang, J. Xiao, H. Luo, D. Wei, F. Luo, J. Sun and H. Fan, *J. Mater. Chem. B*, 2023, **11**, 430-440.
29. S. Chen, A. Z. Weitemier, X. Zeng, L. He, X. Wang, Y. Tao, A. J. Y. Huang, Y. Hashimoto-dani, M. Kano, H. Iwasaki, L. K. Parajuli, S. Okabe, D. B. L. Teh, A. H. All, I. Tsutsui-Kimura, K. F. Tanaka, X. Liu and T. J. McHugh, *Science*, 2018, **359**, 679-684.
30. Y. Wang, K. Xie, H. Yue, X. Chen, X. Luo, Q. Liao, M. Liu, F. Wang and P. Shi, *Nanoscale*, 2020, **12**, 2406-2414.
31. J.-u. Lee, W. Shin, Y. Lim, J. Kim, W. R. Kim, H. Kim, J.-H. Lee and J. Cheon, *Nat. Mater.*, 2021, **20**, 1029-1036.
32. D. Gregurec, A. W. Senko, A. Chuvilin, P. D. Reddy, A. Sankararaman, D. Rosenfeld, P.-H. Chiang, F. Garcia, I. Tafel, G. Varnavides, E. Ciocan and P. Anikeeva, *ACS Nano*, 2020, **14**, 8036-8045.
33. A. Tay, A. Sohrabi, K. Poole, S. Seidlits and D. Di Carlo, *Adv. Mater.*, 2018, **30**, 1800927.
34. S. Jeong, W. Shin, M. Park, J.-u. Lee, Y. Lim, K. Noh, J.-H. Lee, Y.-w. Jun, M. Kwak and J. Cheon, *Nano Lett.*, 2023, **23**, 5227-5235.
